# Supplementary material for: Reporting quality in abstracts of meta-analyses of depression screening tool accuracy: a review of systematic reviews and meta-analyses
Source: PubMed Central journal article supplement — BMJ Open. 2016 Nov 18;6(11):e012867. doi: 10.1136/bmjopen-2016-012867 (PMC5128996; doi:10.1136/bmjopen-2016-012867), 2016-11-18
Supplement: bmjopen-2016-012867supp_appendix1.pdf [file bmjopen-2016-012867supp_appendix1.pdf]

## **S1 Appendix. Search Strategy**

### **Ovid MEDLINE In-Process & Other Non-Indexed Citations and Ovid MEDLINE**

1. Mass Screening/
2. Psychiatric Status Rating Scales/
3. "Predictive Value of Tests"/
4. "Reproducibility of Results"/
5. exp "Sensitivity and Specificity"/
6. Psychometrics/
7. Prevalence/
8. Reference Values/
9. Reference Standards/
10. exp Diagnostic Errors/
11. validation studies.pt.
12. comparative study.pt.
13. screen\*.af.
14. prevalence.af.
15. predictive value\*.af.
16. detect\*.ti.
17. sensitiv\*.ti.
18. valid\*.ti.
19. revalid\*.ti.
20. predict\*.ti.
21. accur\*.ti.
22. psychometric\*.ti.
23. identif\*.ti.
24. specificit\*.ab.
25. cut?off\*.ab.
26. cut\* score\*.ab.
27. cut?point\*.ab.
28. threshold score\*.ab.
29. reference standard\*.ab.
30. reference test\*.ab.
31. index test\*.ab.
32. gold standard.ab.
33. or/1-32
34. Depression/
35. Depressive Disorder/
36. Depressive Disorder, Major/
37. Depressive Disorder, Postpartum/
38. depress\*.tw.
39. or/34-38
40. Meta-Analysis/
41. meta-analysis as topic/
42. meta analysis.pt.
43. meta analy\*.tw.

44. or/40-43
45. 33 and 39 and 44
46. limit 45 to yr="2005 -Current"

### **PsycINFO**

1. Diagnosis/
2. Medical Diagnosis/
3. Psychodiagnosis/
4. Misdiagnosis/
5. Screening/
6. Health Screening/
7. Screening Tests/
8. Prediction/
9. Cutting Scores/
10. Psychometrics/
11. Test Validity/
12. screen\*.af.
13. predictive value\*.af.
14. detect\*.ti.
15. sensitiv\*.ti.
16. valid\*.ti.
17. revalid\*.ti.
18. accura\*.ti.
19. psychometric\*.ti.
20. specificit\*.ab.
21. cut?off\*.ab.
22. cut\* score\*.ab.
23. cut?point\*.ab.
24. threshold score\*.ab.
25. reference standard\*.ab.
26. reference test\*.ab.
27. index test\*.ab.
28. gold standard.ab.
29. or/1-28
30. major depression/
31. exp "Depression (Emotion)"/
32. postpartum depression/
33. depress\*.tw.
34. or/30-33
35. meta analysis/
36. "1200".md.
37. meta analy\*.tw.
38. or/35-37
39. 29 and 34 and 38
40. limit 39 to yr="2005 -Current"
