# Supplementary material for: Reporting quality in abstracts of meta-analyses of depression screening tool accuracy: a review of systematic reviews and meta-analyses
Source: PubMed Central journal article supplement — BMJ Open. 2016 Nov 18;6(11):e012867. doi: 10.1136/bmjopen-2016-012867 (PMC5128996; doi:10.1136/bmjopen-2016-012867), 2016-11-18
Supplement: bmjopen-2016-012867supp_appendix3.pdf [file bmjopen-2016-012867supp_appendix3.pdf]

### S3 Appendix. Sources of Journal Word Limits

| Author, Year      | Name of Journal               | URL Website                                                                                                                                                                                                         | Abstract Word Count Limit |
|-------------------|-------------------------------|---------------------------------------------------------------------------------------------------------------------------------------------------------------------------------------------------------------------|---------------------------|
| Pocklington, 2016 | Int J Geriatr Psychiatry      | <a href="http://onlinelibrary.wiley.com/journal/10.1002/(ISSN)1099-1166/homepage/ForAuthors.html">http://onlinelibrary.wiley.com/journal/10.1002/(ISSN)1099-1166/homepage/ForAuthors.html</a>                       | 250                       |
| Bosanquet, 2015   | BMJ Open                      | <a href="http://bmjopen.bmj.com/site/about/guidelines.xhtml">http://bmjopen.bmj.com/site/about/guidelines.xhtml</a>                                                                                                 | 300                       |
| Moriarty, 2015    | Gen Hosp Psychiatry           | <a href="https://www.elsevier.com/journals/general-hospital-psychiatry/0163-8343/guide-for-authors">https://www.elsevier.com/journals/general-hospital-psychiatry/0163-8343/guide-for-authors</a>                   | 200                       |
| Stockings, 2015   | J Affect Disord               | <a href="https://www.elsevier.com/journals/journal-of-affective-disorders/0165-0327/guide-for-authors#39000">https://www.elsevier.com/journals/journal-of-affective-disorders/0165-0327/guide-for-authors#39000</a> | 250                       |
| Manea, 2015       | Gen Hosp Psychiatry           | <a href="https://www.elsevier.com/journals/general-hospital-psychiatry/0163-8343/guide-for-authors">https://www.elsevier.com/journals/general-hospital-psychiatry/0163-8343/guide-for-authors</a>                   | 200                       |
| Meader, 2014      | J Neurol Neurosurg Psychiatry | <a href="http://jnnp.bmj.com/site/about/guidelines.xhtml">http://jnnp.bmj.com/site/about/guidelines.xhtml</a>                                                                                                       | 250                       |
| Tsai, 2014        | JAIDS                         | <a href="http://edmgr.ovid.com/jaids/accounts/ifauth.htm">http://edmgr.ovid.com/jaids/accounts/ifauth.htm</a>                                                                                                       | 250                       |
| Tsai, 2013        | PLoS One                      | <a href="http://journals.plos.org/plosone/s/submission-guidelines#loc-abstract">http://journals.plos.org/plosone/s/submission-guidelines#loc-abstract</a>                                                           | 300                       |
| Mitchell, 2012    | J Affect Disord               | <a href="http://www.elsevier.com/journals/journal-of-affective-disorders/0165-0327?generatepdf=true">http://www.elsevier.com/journals/journal-of-affective-disorders/0165-0327?generatepdf=true</a>                 | 250                       |

|                 |                         |                                                                                                                                                                                                             |     |
|-----------------|-------------------------|-------------------------------------------------------------------------------------------------------------------------------------------------------------------------------------------------------------|-----|
| Manea, 2012     | CMAJ                    | <a href="http://www.cmaj.ca/site/authors/preparing.xhtml#_Preparing_text_for">http://www.cmaj.ca/site/authors/preparing.xhtml#_Preparing_text_for</a>                                                       | 250 |
| Meader, 2011    | Br J Gen Pract          | <a href="http://bjgp.org/authors/writing-for-bjgp-research">http://bjgp.org/authors/writing-for-bjgp-research</a>                                                                                           | 250 |
| Vodermaier 2011 | Support Care Cancer     | <a href="http://www.springer.com/medicine/oncology/journal/520">http://www.springer.com/medicine/oncology/journal/520</a>                                                                                   | 250 |
| Brennan, 2010   | J Psychosom Res         | <a href="http://www.elsevier.com/journals/journal-of-psychosomatic-research/0022-3999/guide-for-authors">http://www.elsevier.com/journals/journal-of-psychosomatic-research/0022-3999/guide-for-authors</a> | 250 |
| Mitchell, 2010a | Am J Geriatr Psychiatry | <a href="http://www.editorialmanager.com/jgp/account/InstructionsForAuthors.pdf">http://www.editorialmanager.com/jgp/account/InstructionsForAuthors.pdf</a>                                                 | 250 |
| Mitchell, 2010b | J Affect Disord         | <a href="http://www.elsevier.com/journals/journal-of-affective-disorders/0165-0327?generatepdf=true">http://www.elsevier.com/journals/journal-of-affective-disorders/0165-0327?generatepdf=true</a>         | 250 |
| Mitchell, 2010c | J Affect Disord         | <a href="http://www.elsevier.com/journals/journal-of-affective-disorders/0165-0327?generatepdf=true">http://www.elsevier.com/journals/journal-of-affective-disorders/0165-0327?generatepdf=true</a>         | 250 |
| Hewitt, 2009    | Health Technol Assess   | <a href="http://www.journalslibrary.nihr.ac.uk/information-for-authors/abstract">http://www.journalslibrary.nihr.ac.uk/information-for-authors/abstract</a>                                                 | 500 |
| Mitchell, 2008  | Br J Cancer             | <a href="http://www.nature.com/bjc/authors/submit.html#manuscript-format">http://www.nature.com/bjc/authors/submit.html#manuscript-format</a>                                                               | 200 |
| Mitchell, 2007  | J Gen Intern Med        | <a href="http://bjgp.org/authors/writing-for-bjgp-research">http://bjgp.org/authors/writing-for-bjgp-research</a>                                                                                           | 250 |
| Wittkamp, 2007  | Br J Gen Pract          | <a href="http://www.elsevier.com/journals/general-hospital-psychiatry/0163-8343/guide-for-authors#39001">http://www.elsevier.com/journals/general-hospital-psychiatry/0163-8343/guide-for-authors#39001</a> | 200 |
| Gilbody, 2007   | Gen Hosp Psychiatry     | <a href="http://www.jgimed.org/authors/jgim%20instructions%20for%20authors.pdf">http://www.jgimed.org/authors/jgim%20instructions%20for%20authors.pdf</a>                                                   | 300 |
