# Supplementary material for: Reporting quality in abstracts of meta-analyses of depression screening tool accuracy: a review of systematic reviews and meta-analyses
Source: PubMed Central journal article supplement — BMJ Open. 2016 Nov 18;6(11):e012867. doi: 10.1136/bmjopen-2016-012867 (PMC5128996; doi:10.1136/bmjopen-2016-012867), 2016-11-18
Supplement: bmjopen-2016-012867supp_appendix4.pdf [file bmjopen-2016-012867supp_appendix4.pdf]

#### **S4 Appendix. List of Excluded Studies**

1. Akena D, Joska J, Obuku EA, Amos T, Musisi S, Stein DJ. Comparing the accuracy of brief versus long depression screening instruments which have been validated in low and middle income countries: a systematic review. *BMC Psychiatry*. 2012;12:187.
2. Farr SL, Dietz PM, Gibbs FA, Williams JR, Tregear S. Peer Reviewed: Depression Screening and Treatment Among Nonpregnant Women of Reproductive Age in the United States, 1990-2010. *Preventing chronic disease*. 2011 Nov;8(6).
3. Ziegler L, Hill K, Neilly L, Bennett MI, Higginson IJ, Murray SA, et al. Identifying psychological distress at key stages of the cancer illness trajectory: a systematic review of validated self-report measures. *J Pain Symptom Manage*. 2011;41(3):619-36.
4. Mitchell AJ. Short screening tools for cancer-related distress: a review and diagnostic validity meta-analysis. *J Natl Compr Canc Netw*. 2010;8(4):487-94.
5. Mirkhil S, Kent PM. The diagnostic accuracy of brief screening questions for psychosocial risk factors of poor outcome from an episode of pain: A systematic review. *Clin J Pain*. 2009;25(4):340-8.
6. Gaynes BN, Gavin N, Meltzer-Brody S, Lohr KN, Swinson T, Gartlehner G, et al. Perinatal depression: prevalence, screening accuracy, and screening outcomes. *Evid Rep Technol Assess (Summ)*. 2005(119):1-8.
7. Yirmiya R, Bab I. Major depression is a risk factor for low bone mineral density: a meta-analysis. *Biol Psychiatry*. 2009;66(5):423-32.
